# Supplementary material
Source: PubMed Central journal article supplement (PMC4876908)
Supplement: NIHMS67962-supplement-Supp_Fig.pdf [file NIHMS67962-supplement-Supp_Fig.pdf]

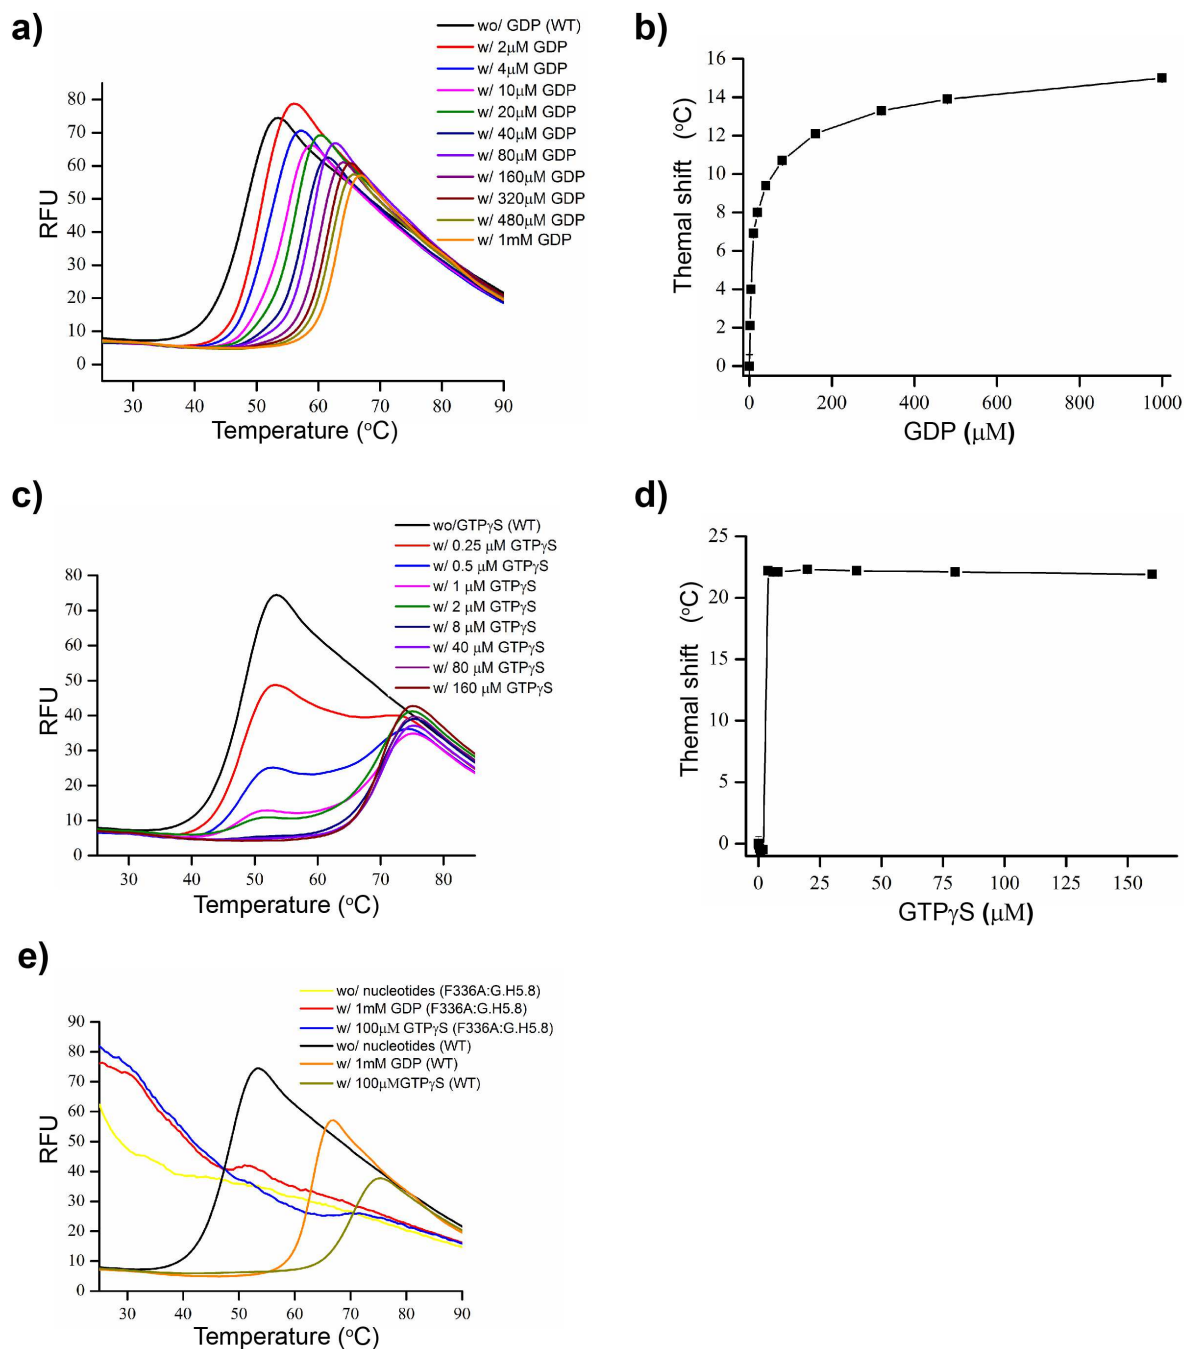

### Supplementary Figure 1

Monitoring the thermal stability of WT  $G\alpha_{i1}$  by differential scanning fluorimetry (DSF) upon addition of increasing concentration of nucleotides

**a, b,** Melting curves of WT  $G\alpha_{i1}$  in the presence of GDP (**a**) and stabilization effect concentration-response curve (**b**). Stability increase [ $T_m$  (w/ GDP) -  $T_m$  (wo/ GDP)] is plotted against the concentration of GDP.  $T_m$  of WT  $G\alpha_{i1}$  in addition of 1mM GDP reflects the thermal stability of WT  $G\alpha_{i1}$  in the GDP-bound state [ $G\alpha_{i1}$ (WT)-GDP]. **c, d,** Melting profiles of WT

G $\alpha_{i1}$  in presence of GTP $\gamma$ S (**c**) and stability increase concentration-response curve (**d**).  $T_m$  of WT G $\alpha_{i1}$  in addition of 100  $\mu$ M GTP $\gamma$ S was finally chosen to reflect the thermal stability of WT G $\alpha_{i1}$  in the GTP $\gamma$ S-bound state. The thermal stability measurement of all G $\alpha_{i1}$  alanine mutants in the nucleotide-bound state was performed upon addition of 1mM GDP or 100  $\mu$ M GTP $\gamma$ S. **e**, Thermal profile of F336A<sup>G.H5.8</sup> in the nucleotide-bound state. The melting curve shows that alanine replacement of F336<sup>G.H5.8</sup> in G $\alpha_{i1}$  completely impairs the protein stability and activity of coupling with nucleotides. The details of DSF experiments are described in the methods section.

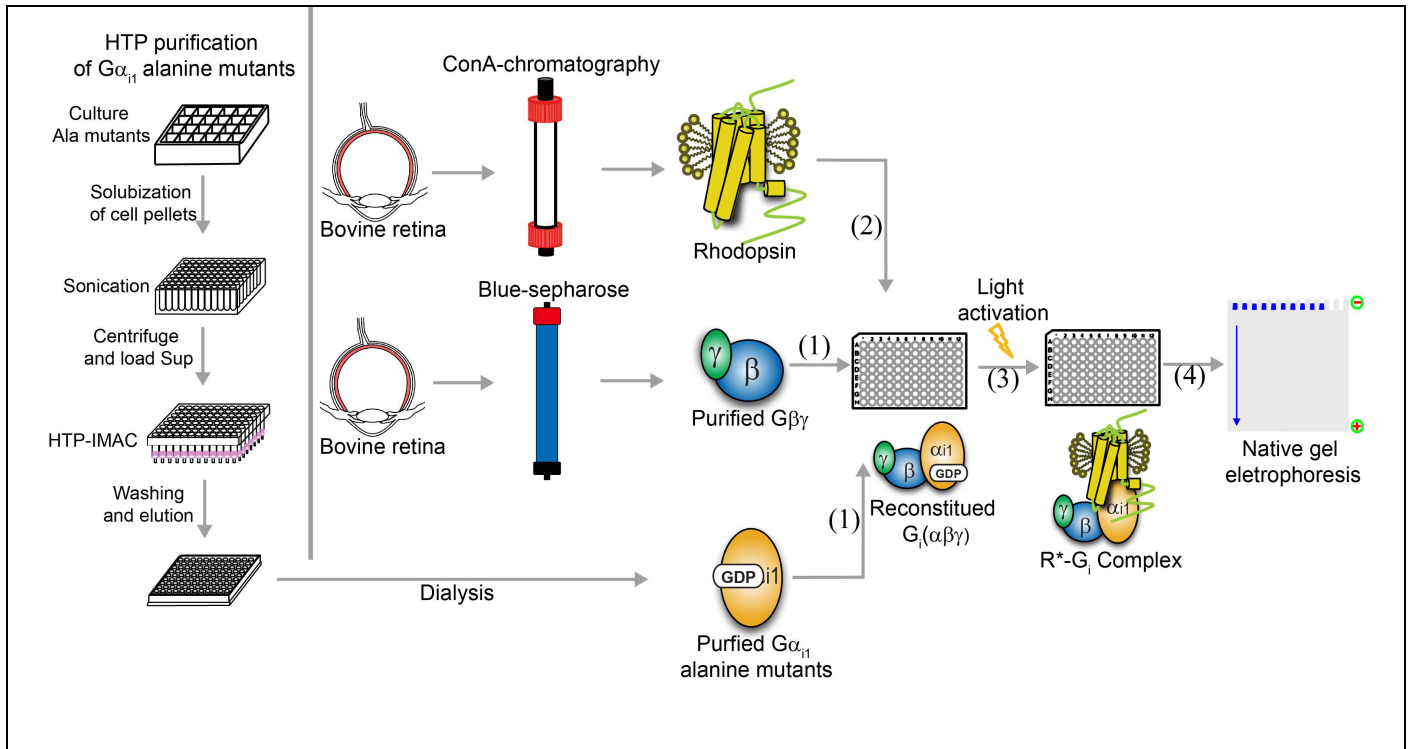

### Supplementary Figure 2

#### High-throughput (HTP) assay for monitoring effect of $G\alpha_{i1}$ alanine mutants on $Rho^*-G_i$ complex

The recombinant  $G\alpha_{i1}$  alanine mutants were prepared by HTP purification as shown in the left panel, and the endogenous rhodopsin and  $\beta\gamma$  subunit were prepared from bovine retinas. For the formation of  $Rho^*-G_i$  complex,  $G\alpha_{i1}$  and  $\beta\gamma$  subunit were reconstituted to form  $G_i$  heterotrimer, followed by mixing with rhodopsin and light activation. The formed  $Rho^*-G_i$  complex was visualized by native gel electrophoresis and the gel bands of complex were quantified by ImageJ software. In each round, WT  $G\alpha_{i1}$  was always included as the reference control. The experimental details of HTP assay are described in methods section.

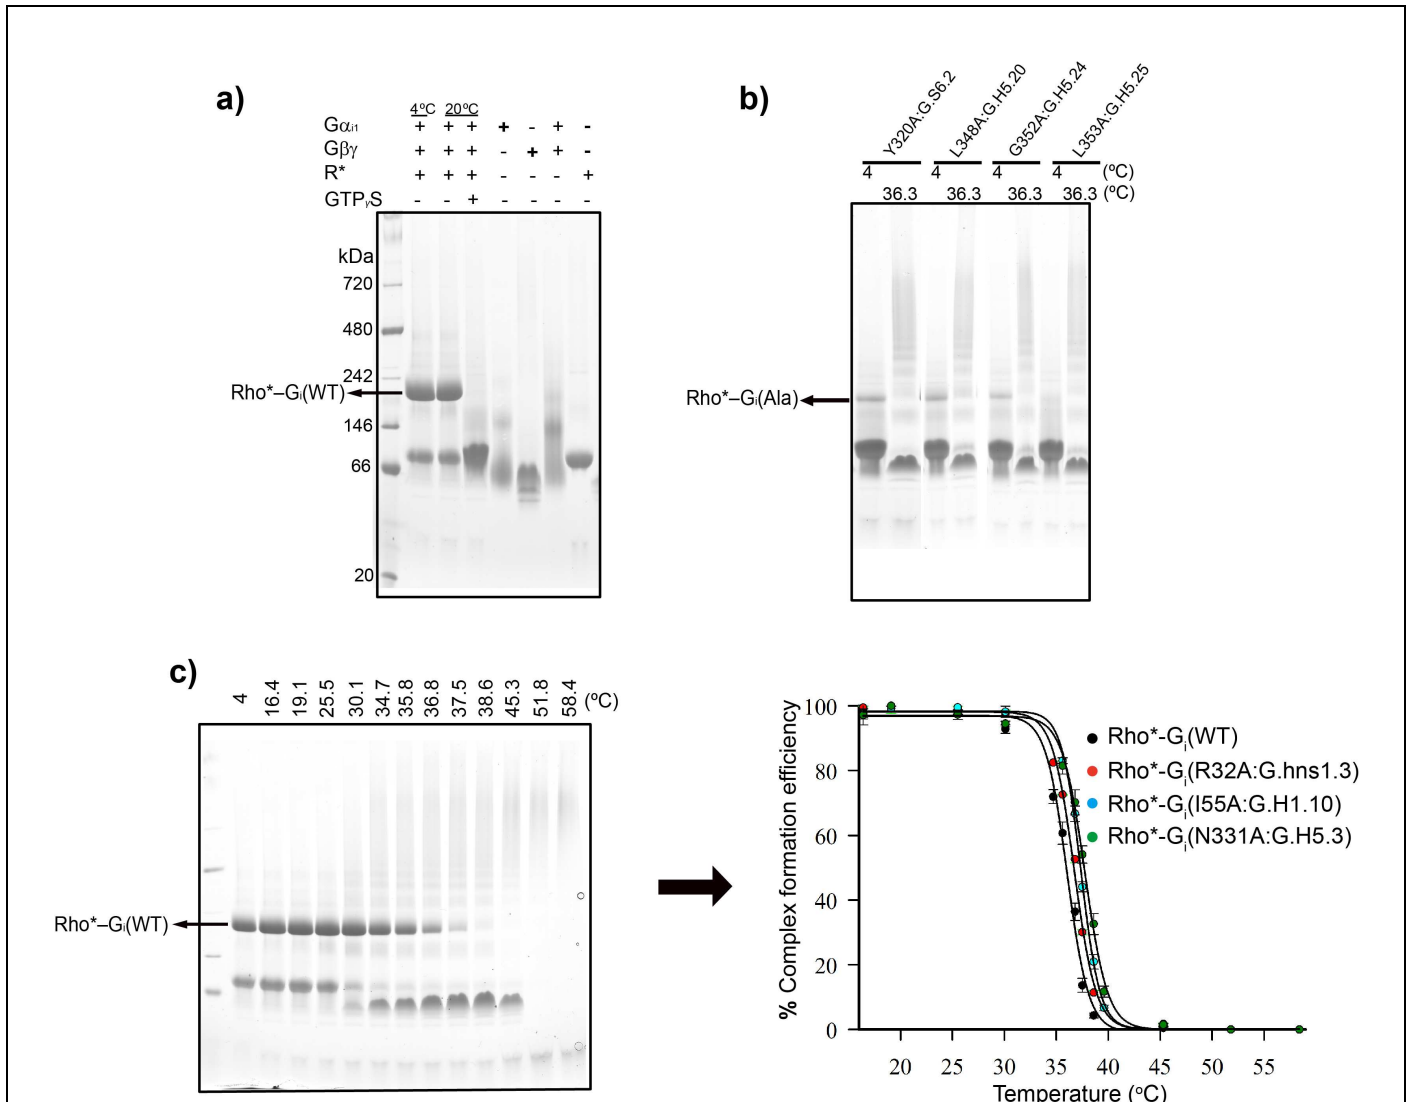

### Supplementary Figure 3

#### Characterization of G $\alpha_{i1}$ alanine mutants by the native gel electrophoresis

**a**, Visualization of Rho\*-G<sub>i</sub>(WT) complex. The Rho\*-G<sub>i</sub>(WT) complex (+/- GTP $\gamma$ S) was visualized by the native gel electrophoresis, as well as with WT G $\alpha_{i1}$ ,  $\beta\gamma$  subunit, reconstituted G<sub>i</sub> heterotrimer, and the activated rhodopsin as reference markers. The data clearly show that the Rho\*-G<sub>i</sub>(WT) complex is stable in the absence of nucleotides and that the addition of GTP $\gamma$ S dissociates the complex. **b**, G $\alpha_{i1}$  alanine mutants impairing the formation of Rho\*-G<sub>i</sub> complex. The Rho\*-G<sub>i</sub> complexes were formed with WT, Y320A<sup>G.S6.2</sup>, L348A<sup>G.H5.20</sup>, G352A<sup>G.H5.24</sup> and L353A<sup>G.H5.25</sup> of G $\alpha_{i1}$  at 4 °C and heated at 36.3 °C, followed by the native gel electrophoresis. The results clearly show that these four G $\alpha_{i1}$  alanine mutants are severely impaired in their ability to form the Rho\*-G<sub>i</sub> complex. **c**, Monitoring the thermal dissociation (Td) of Rho\*-G<sub>i</sub> complex. The Rho\*-G<sub>i</sub> complex formed with WT G $\alpha_{i1}$  was heated at the indicated temperature and visualized by the native gel electrophoresis. The gel bands of Rho\*-G<sub>i</sub> complex were integrated and quantified by ImageJ software. The determined Td<sub>50</sub> value of Rho\*-G<sub>i</sub>(WT) is 36.0 ± 0.1 °C. The same experiment was also performed with Rho\*-G<sub>i</sub>(R32A<sup>G.hns1.3</sup>), Rho\*-G<sub>i</sub>(I55A<sup>G.H1.10</sup>) and Rho\*-G<sub>i</sub>(N331A<sup>G.H5.3</sup>) and the determined Td<sub>50</sub> values are 36.7 ± 0.1 °C, 37.4 ± 0.1 °C and 37.8 ± 0.1 °C, respectively, indicating these three alanine mutants stabilize the receptor-bound state. Data points represent mean ± s.d. from three individual experiments.

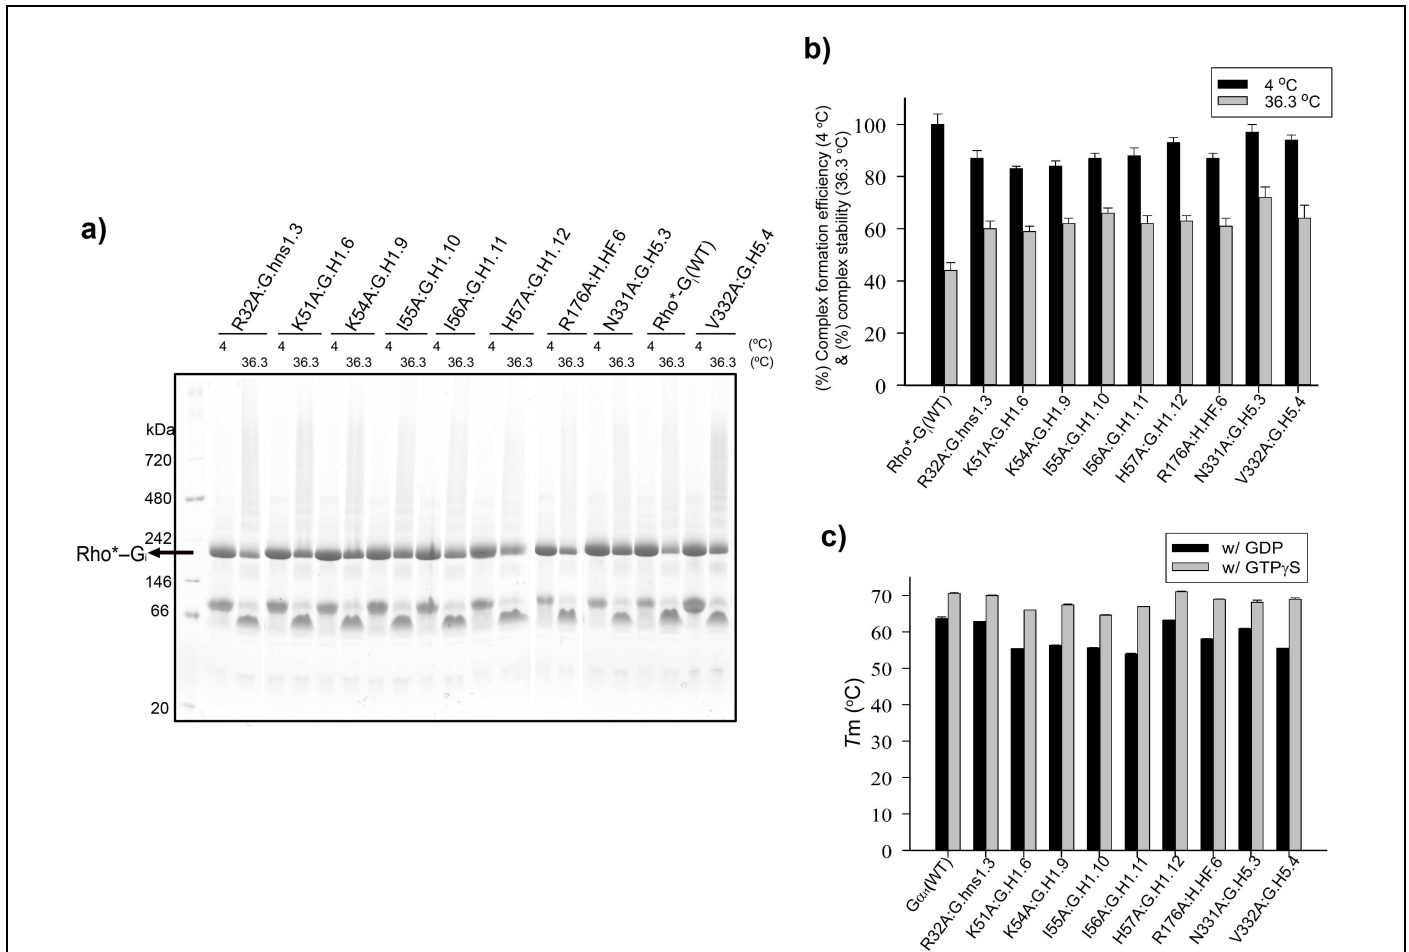

#### Supplementary Figure 4

##### Characterization of G $\alpha_{i1}$ alanine mutants in stabilizing the Rho\*<sup>-</sup>G<sub>i</sub> complex

**a**, Visualization of Rho\*<sup>-</sup>G<sub>i</sub> complex by the native gel electrophoresis. The Rho\*<sup>-</sup>G<sub>i</sub> complexes were formed with WT, R32A<sup>G.hns1.3</sup>, K51A<sup>G.H1.6</sup>, I56A<sup>G.H1.11</sup>, K54A<sup>G.H1.9</sup>, I55A<sup>G.H1.10</sup>, H57A<sup>G.H1.12</sup>, R176A<sup>H.HF.6</sup>, N331A<sup>G.H5.3</sup> and V332A<sup>G.H5.4</sup> of G $\alpha_{i1}$  at 4 °C and heated at 36.3 °C, followed by the native gel electrophoresis as described in methods section. **b**, G $\alpha_{i1}$  alanine mutants stabilize the Rho\*<sup>-</sup>G<sub>i</sub> complex. The gel bands of Rho\*<sup>-</sup>G<sub>i</sub> complexes were integrated and quantified using the ImageJ software. The complex formation efficiency (%) at 4 °C and complex stability (%) at 36.3 °C were defined and determined as described in methods section. The results show that these G $\alpha_{i1}$  alanine mutants obviously enhance the thermal stability of Rho\*<sup>-</sup>G<sub>i</sub> complex. **c**,  $T_m$  of G $\alpha_{i1}$  alanine mutants which stabilize the receptor-bound state.  $T_m$  was measured upon addition of 1mM GDP or 0.1mM GTP $\gamma$ S using the DSF assay as described in methods section. Data points represent mean  $\pm$  s.d. from three individual experiments.

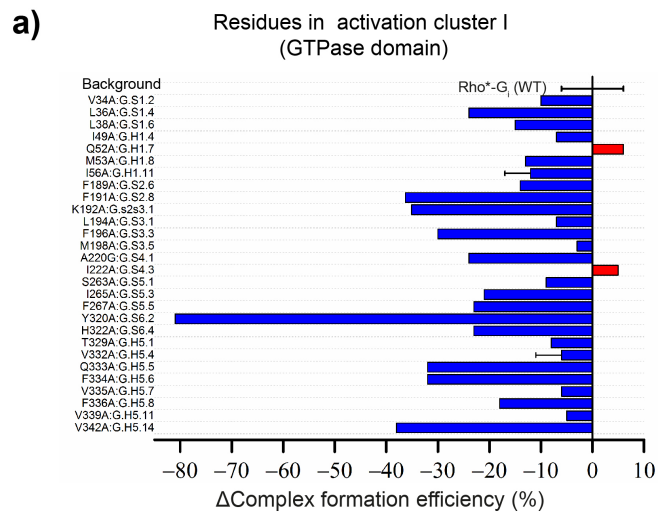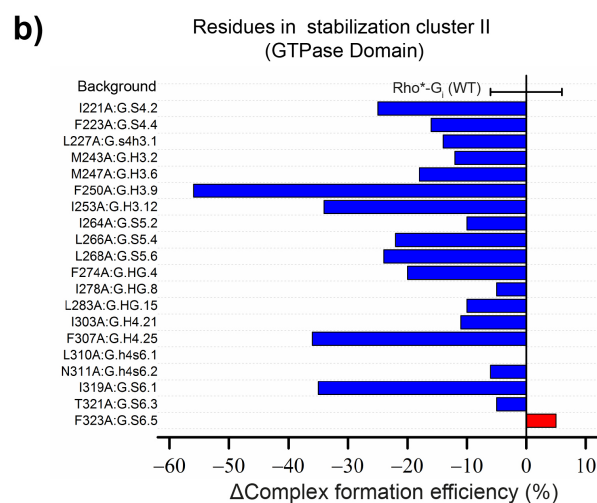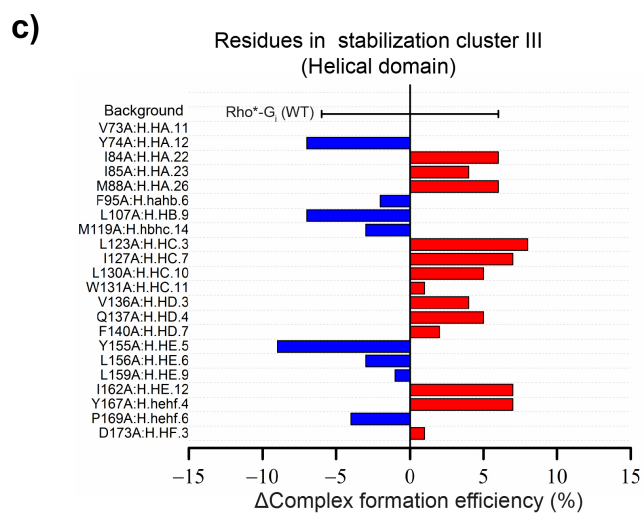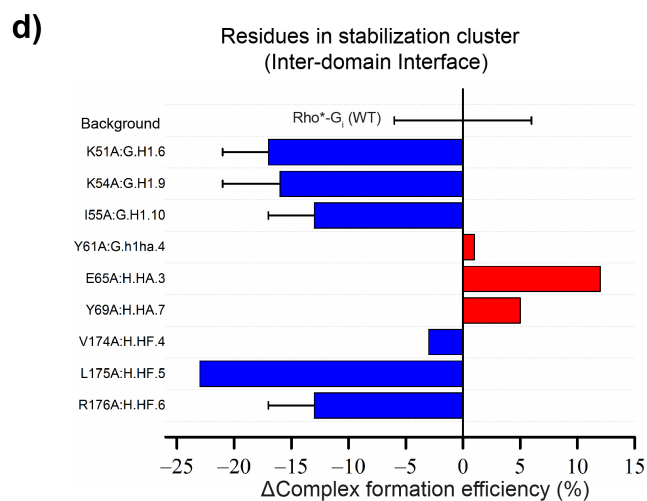

**Supplementary Figure 5**

Effect of alanine substitution of residues involved in the activation and stabilization clusters on Rho\*-G<sub>i</sub> complex formation

**a-d**, Effect on Rho\*-G<sub>i</sub> complex formation of mutation of residues involved in the activation cluster I (**a**) and stabilization cluster II (**b**) of the GTPase domain, stabilization cluster III of helical domain (**c**) and the inter-domain interface (**d**). The increase in  $\Delta$ complex formation efficiency are coloured in red and the reductions are coloured in blue. The definition of  $\Delta$ complex formation efficiency is described in methods section, and the derived numbers are shown in Supplementary Table1..

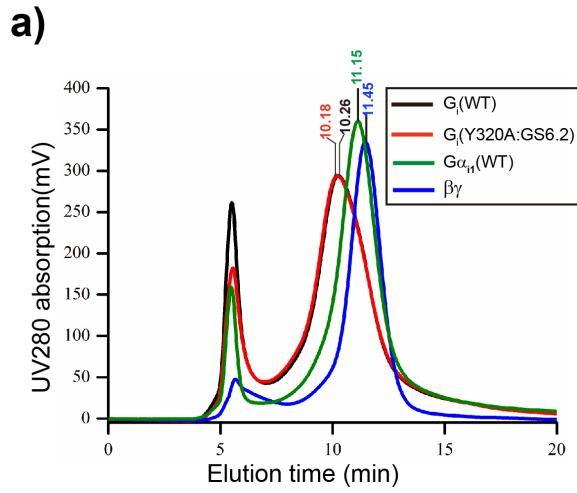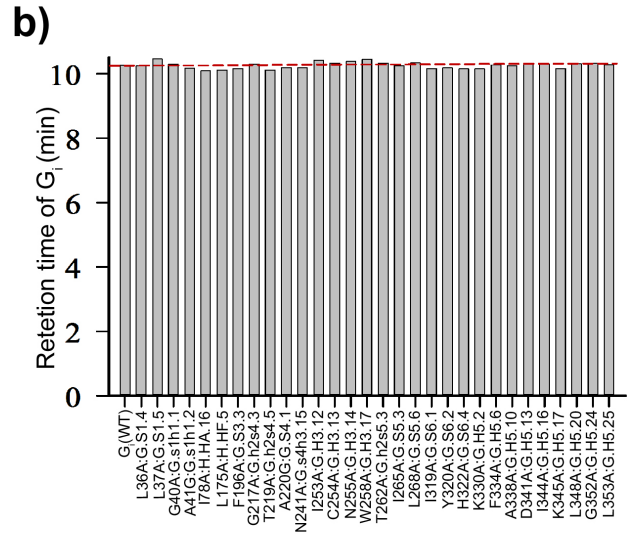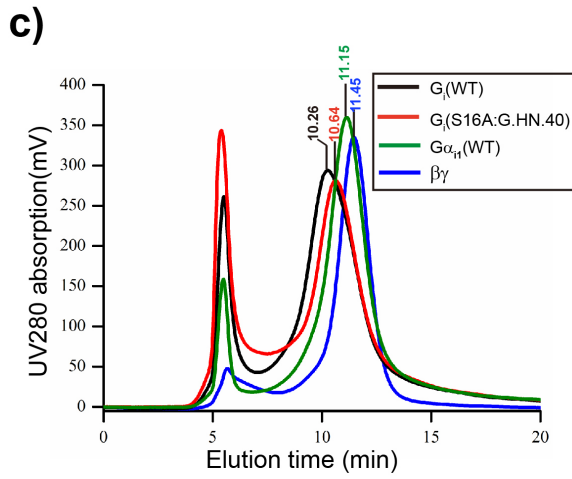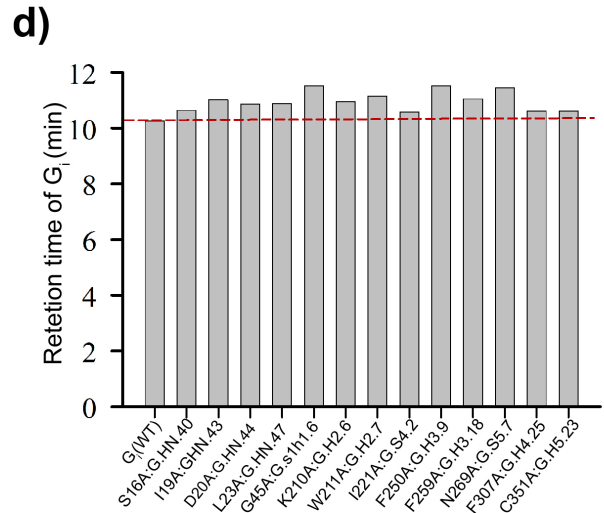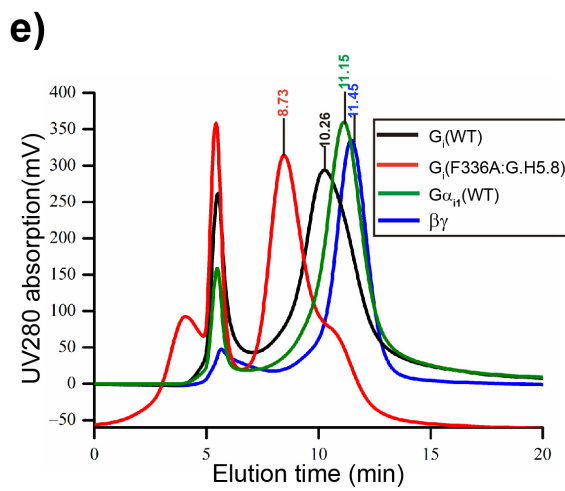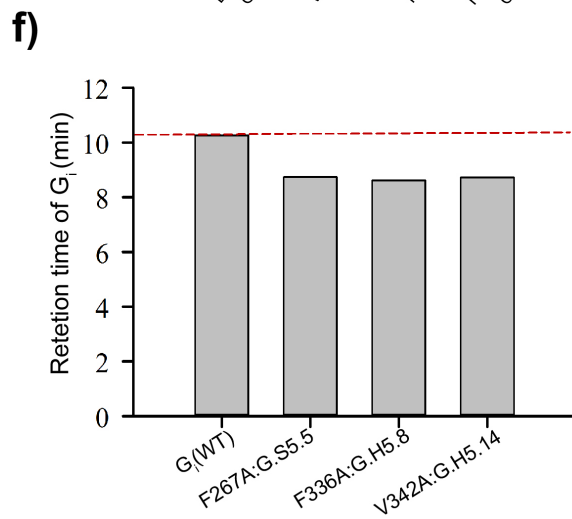

Supplementary Figure 6

Characterization of heterotrimer ( $G_i$ ) formation by the analytical size-exclusion chromatography (FSEC)

**a-f**, Characterization of heterotrimer reconstitution of last 48  $G\alpha_{i1}$  alanine mutants which are inefficient in formation of Rho\*- $G_i$  complex. The reconstitution of  $G_i$  and analysis by FSEC were described in methods section. The retention time of WT  $G\alpha_{i1}$ ,  $\beta\gamma$  subunit and reconstituted  $G_i$  are 11.15 min, 11.45 min and 10.26 min, respectively. **a, b**, Retention time of alanine mutants which are efficient in  $G_i$  reconstitution. **c, d**, Retention time of inefficient alanine mutants in formation of heterotrimer. **e, f**, Retention time of three alanine mutants forming oligomers upon reconstitution.



Overlay of  $G\alpha_{i1}$ -GDP with AtGPA1-GTP $\gamma$ S

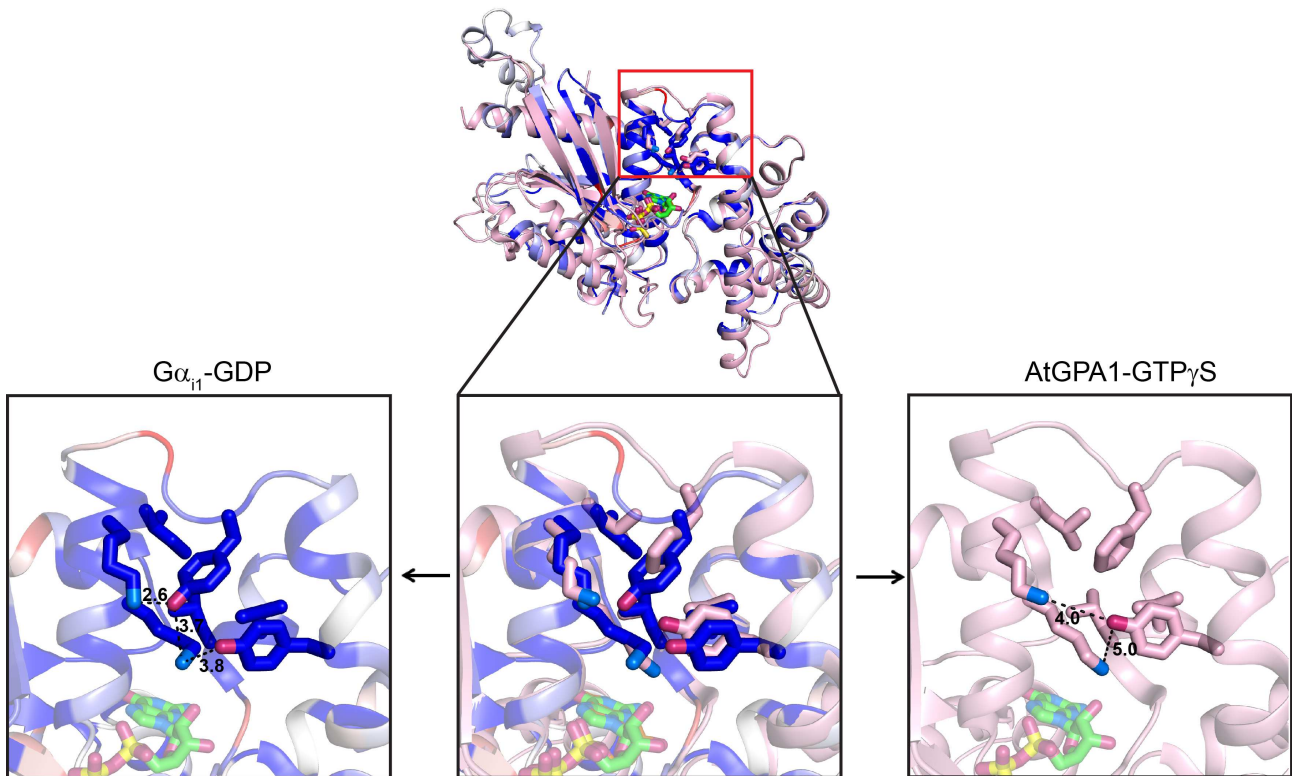

**Supplementary Figure 7**

Structural overlay of  $G\alpha_{i1}$ -GDP with G protein  $\alpha$  subunit from the plant *Arabidopsis thaliana* (AtGPA1)

The crystal structure of  $G\alpha_{i1}$ -GDP (PDB 1GDD) was mapped with the measured  $\Delta T_m$  (in addition of GDP) as spectrum ranging from blue over white to red, as on Fig 1. The structure of AtGPA1-GTP $\gamma$ S (PDB 2XTZ) is shown in light pink. The enlarged opening of the inter-domain interface suggests that the inter-domain interactions in AtGPA1 are much weaker than those in the  $G\alpha_{i1}$ .

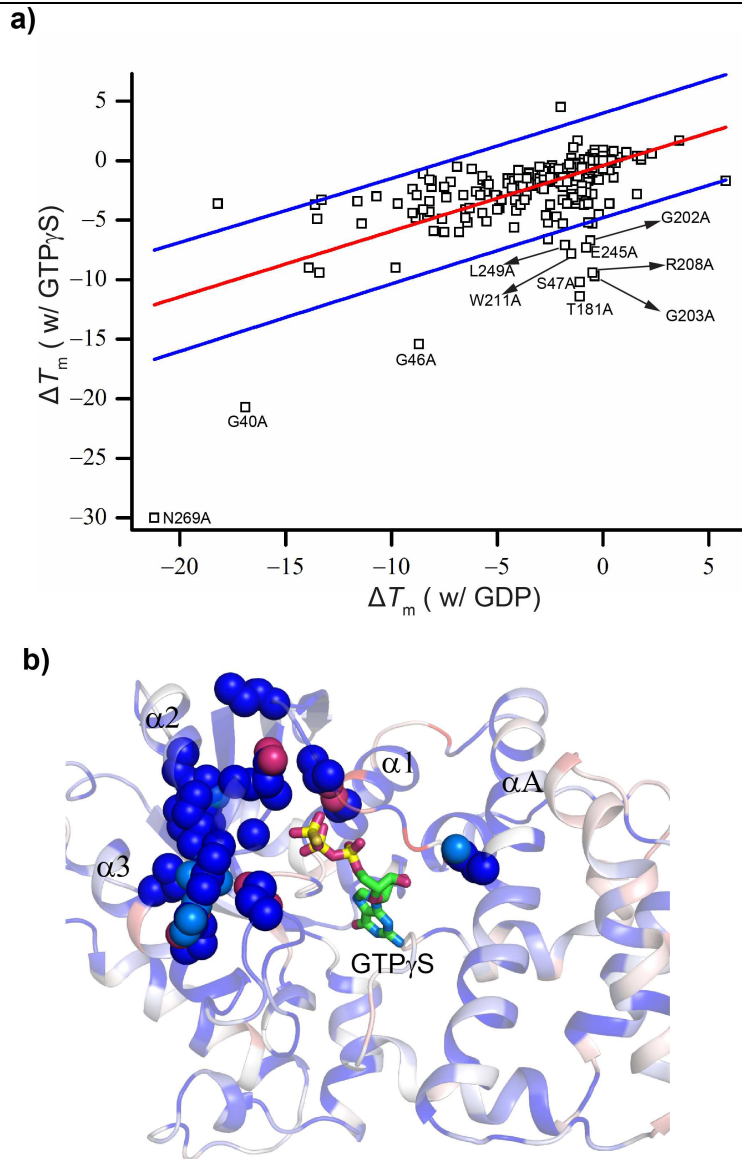

### Supplementary Figure 8

Mutations that affect GTP bound state cluster around the gamma phosphate of the GTP $\gamma$ S

**a**, Correlation of destabilization upon mutation between GDP- and GTP-bound states. The red line shows the linear correlation, blue lines indicate the 95% confidence interval. . The most destabilizing residue is N269A<sup>G.S5.7</sup>, involved in nucleotide binding. **b**, Alanine substitutions that affect GTP bound state locate near the gamma phosphate of GTP $\gamma$ S.  $\Delta T_m$  values for each single alanine mutant are mapped onto the crystal structure of GTP $\gamma$ S-bound G $\alpha_{i1}$  (PDB 1GIA (ref.10), as a spectrum ranging from blue over white to red. Alanine substitutions that specifically affect the GTP-bound state are deviated from **a** and the correlated residues are shown as spheres. In addition, alanine mutations in helix  $\alpha 2$  also specifically affect the GTP-bound state, consistent with the conformational changes leading to the dissociation of the G $\beta\gamma$  subunit.
