# Supplementary material
Source: PubMed Central journal article supplement (PMC4876908)
Supplement: NIHMS67962-supplement-Supp_File.pdf [file NIHMS67962-supplement-Supp_File.pdf]

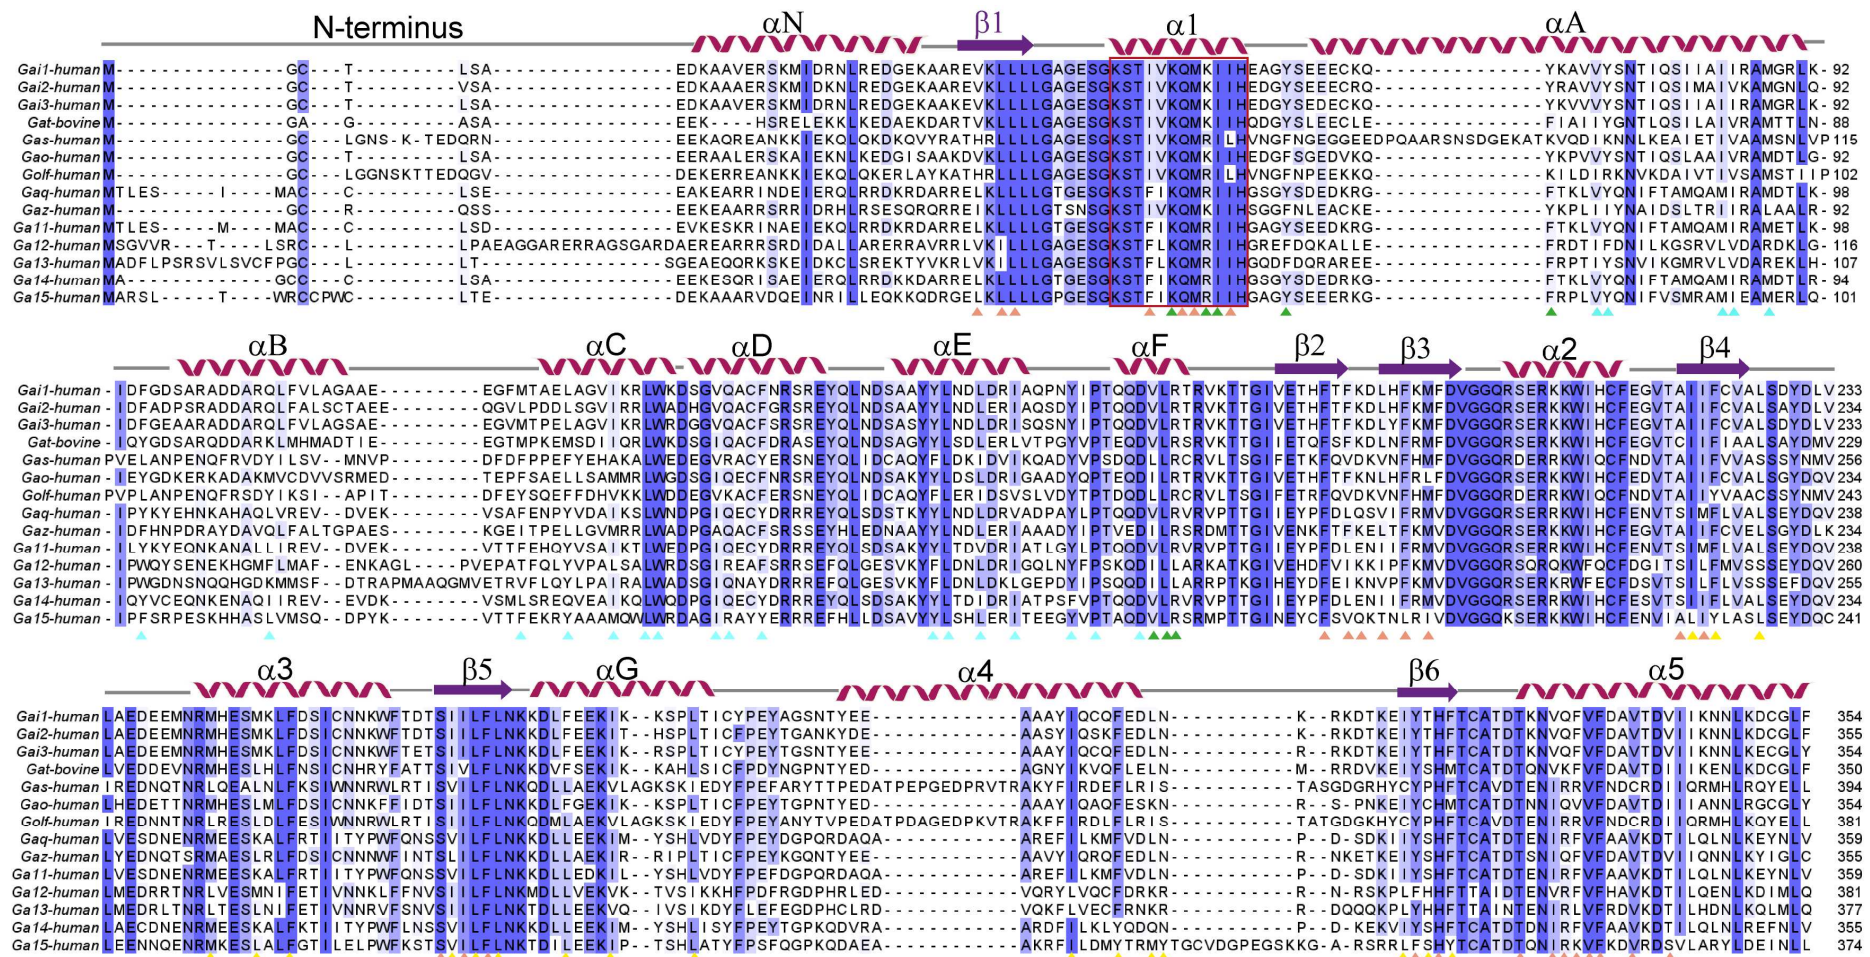

**F1. Multiple Sequence alignment of Ga subunit.** Sequence alignment was performed with Jalview software (Waterhouse, A. M., et al. (2009). "Jalview Version 2--a multiple sequence alignment editor and analysis workbench." *Bioinformatics* **25**(9): 1189-1191, [www.jalview.org](http://www.jalview.org)) based on Clustal algorithm. The conservation of residues is highlighted by blue: the darker the color, the more conserved the residues. The residues which are involved in activation cluster I and stabilisation cluster II of GTPase domain are indicated as light coral and yellow triangle, respectively. The residues which are involved in stabilisation cluster III of HD domain and inter-domain interface are indicated as cyan triangle and green triangle.
